# Supplementary material for: Genome-wide association study identifies two new loci associated with anti-NMDAR encephalitis
Source: bioRxiv or medRxiv preprint supplement (doi:10.1101/2021.03.11.21253347), 2021-03-12
Supplement: Supplementary file [file media-2.pdf]

|                                                      | <b>Cases</b> | <b>Controls</b> | <b>Total</b> |
|------------------------------------------------------|--------------|-----------------|--------------|
| Samples started with                                 | 212          | 1,219           | 1,431        |
| <b>Number of excluded samples</b>                    |              |                 |              |
| Genotyping not successful                            | 0            | NA              | 0            |
| Sample call rate < 85%                               | 3            | 0               | 3            |
| Sample Call rate < 98% or heterozygosity Rate > 3xSD | 13           | 3               | 16           |
| Cryptic relatedness > third degree relatives         | 5            | 13              | 18           |
| Missing or discrepant sex                            | 5            | 0               | 5            |
| Population Outlier                                   | 8            | 0               | 8            |
| Control matching                                     | -            | 613             | 613          |
| <b>Total samples analyzed</b>                        | <b>178</b>   | <b>590</b>      | <b>768</b>   |

### Supplementary Table S2. Sample-based quality control

Summary of sample-based quality control steps of genotyped data. 34 patients with anti-NMDAR encephalitis and 629 healthy controls had to be excluded based on quality control procedures and control matching.
